# Supplementary material
Source: ML conference proceedings conference paper supplement (https://www.ecva.net/papers/eccv_2020/papers_ECCV/html/123560290_ECCV_2020_paper.php)
Supplement: Supplementary file 1 [file 123560290-supp.zip]

## 6 Supplementary

### 6.1 High-resolution image generation

While, for simplicity and efficiency, all the experiments are performed on  $256 \times 256$  pixel images, it is straightforward to increase the output resolution by adding additional layers to the generator and the image discriminators. Figure 9 shows the results of ConfigNet trained at a resolution of  $512 \times 512$  pixels.

### 6.2 Comparison to FaceID-GAN

We perform a qualitative comparison to FaceID-GAN [34] by fine-tuning ConfigNet on a number of images from the FFHQ validation set and generating a variety of poses and expressions to match a figure shown in the FaceID-GAN paper. The results of this comparison are shown in Figure 10. While both methods produce consistent poses and expression and preserve the identity well, ConfigNet outputs images with more consistent illumination and background. This is best exemplified in the third row of Figure 10b where the direction and intensity of illumination stay constant despite change of head pose and expression.

### 6.3 Comparison to CycleGAN

We train CycleGAN [45] to convert images from the synthetic domain (SynthFace [3]) to the real domain (FFHQ [17]). We then generate synthetic image pairs  $I_+$  and  $I_-$ , where all the parameters except the modified attribute  $v$  are randomly generated and identical between the two images. These images are then passed through CycleGAN and an attribute predictor trained on CelebA [23] to generate the controllability metrics:  $C_{pred}(I_+)$ ,  $C_{pred}(I_-)$  and MD (Section 4.1). While CycleGAN and ConfigNet are not fully comparable, as the former does not allow for modifying existing real face images, this simple procedure allows us to compare the two methods in terms of the level of control over images in the real domain.

Table 3 shows the controllability metric results for ConfigNet, CycleGAN and the synthetic data generated with the procedure mentioned above. CycleGAN obtains a slightly better dynamic range  $C_{pred}(I_+) - C_{pred}(I_-)$  than ConfigNet, at a cost of a larger mean absolute difference of other attributes. While the difference in MD may look small in absolute terms, the relative increase compared to ConfigNet is 45%. This leads us to the conclusion that while CycleGAN can preserve the very large difference between the values of the modified attribute  $v$  in  $I_+$  and  $I_-$ , it does not preserve other, more subtle, attributes that should have remained constant. Figure 11 strenghtens this conclusion by showing the effects of hair colour change performed with CycleGAN and ConfigNet, where the former clearly changes other face attributes as well.

The controllability metric results produced by unmodified synthetic data show lowest MD, which is expected, but also lowest dynamic range. We believe

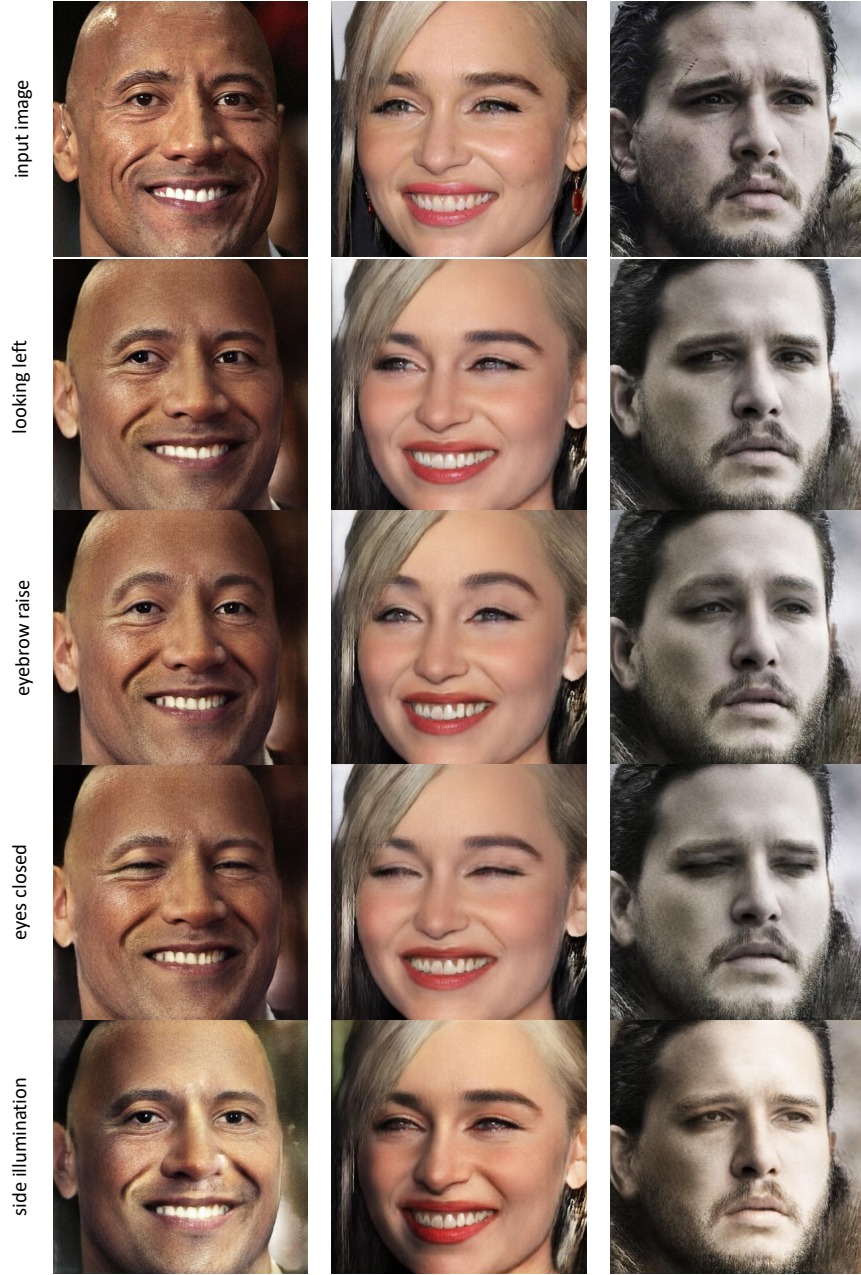

Fig. 9: Results of ConfigNet trained at a resolution of  $512 \times 512$  pixels. First row shows input image, while the remaining rows show outputs of ConfigNet fine-tuned on the input image. For expression modification we use the fine-grained control procedure (Section 3.6) that allows to modify a subset of the expressions.

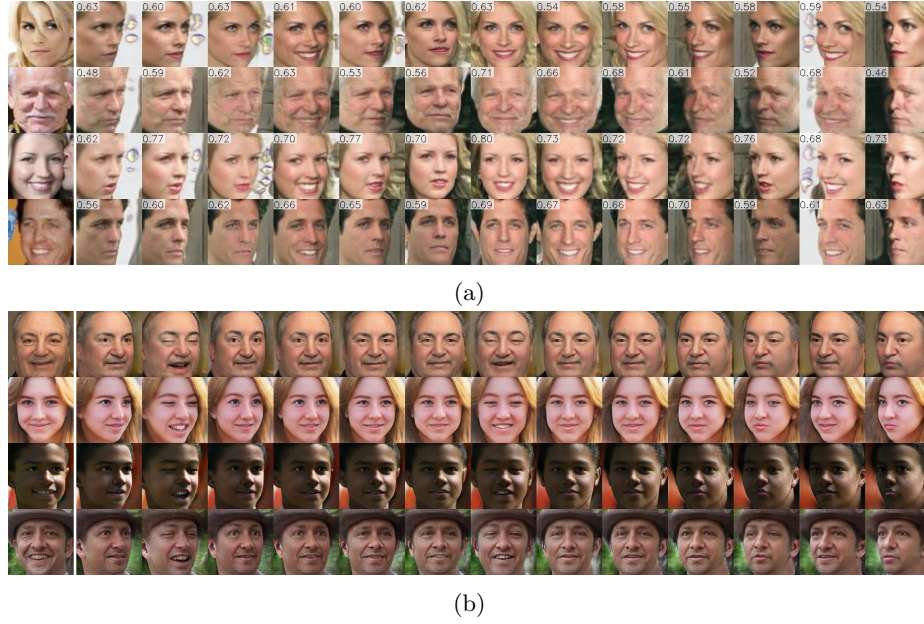

Fig. 10: Qualitative comparison of a) FaceID-GAN [34] and b) ConfigNet. First column shows the input image, while the remaining columns show varying pose and expression. The identities in a) come from the CelebA [23] and LFW [13] datasets, while the ones in b) come from the validation set of FFHQ [17]. Compared to FaceID-GAN, ConfigNet produces results with more consistent illumination and background.

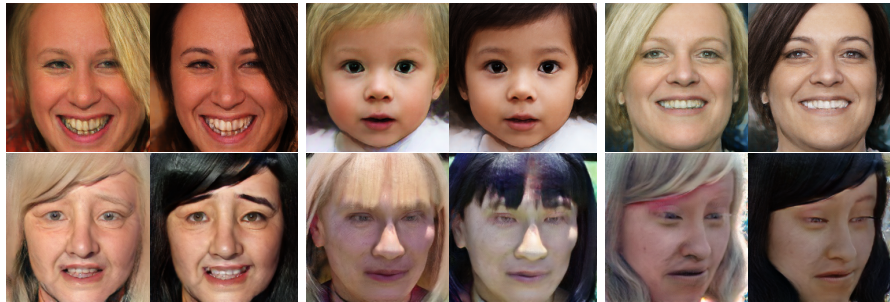

Fig. 11: Change of hair colour from blond to black using ConfigNet (top) and synthetic data processed by CycleGAN (bottom). CycleGAN fails to preserve facial attributes like expression and skin colour that should remain constant between the image pairs.

Table 3: Average controllability metrics for ConfigNet, CycleGAN and synthetic data. Ideally,  $C_{pred}(I_+) = 1$ ,  $C_{pred}(I_-) = 0$  and MD should be 0. The mean difference  $C_{pred}(I_+) - C_{pred}(I_-)$  gives the dynamic range of a given attribute, the higher it is the more controllable the attribute.

| Method         | $C_{pred}(I_+) \uparrow$ | $C_{pred}(I_-) \downarrow$ | MD $\downarrow$ | $C_{pred}(I_+) - C_{pred}(I_-) \uparrow$ |
|----------------|--------------------------|----------------------------|-----------------|------------------------------------------|
| base method    | 0.54                     | 0.04                       | 0.055           | 0.50                                     |
| CycleGAN       | 0.52                     | 0.01                       | 0.080           | 0.51                                     |
| synthetic data | 0.46                     | 0.01                       | 0.051           | 0.45                                     |

that this is caused by the domain gap between the synthetic dataset and the CelebA dataset which was used to train the attribute predictor.

To compare ConfigNet to CycleGAN in terms of the photorealism of generated images, we generate an additional set of 10k synthetic images and pass them through CycleGAN. We then compute the Frechet Inception Distance (FID) between the converted synthetic images and images from the FFHQ validation set. The FID score for CycleGAN is 37.74, while the score for ConfigNet is 33.41 as reported in Section 4.

#### 6.4 Implementation details

For the perceptual loss we use layers conv\_1\_2, conv\_2\_2, conv\_3\_4, conv\_4\_4 of VGG-19. We regularize all the discriminators with the  $R_1$  gradient penalty described in [25]. In the image discriminators, we also use the style discriminator loss  $\mathcal{L}_{style}$  described in HoloGAN [27], while in the generator we add the identity loss  $\mathcal{L}_{identity}$  described in the same paper. While HoloGAN re-uses the discriminator features for identity loss, we use a separate network that has the same architecture as the image discriminators. We do so, because neither of our discriminators is trained to work with both real and synthetic data. We set the loss weights as follows: eye loss weight  $\lambda_{eye} = 5$ , domain adversarial loss weight  $\lambda_{DA} = 5$ , identity loss weight  $\lambda_{identity} = 10$ , gradient penalty loss weight  $\lambda_{R_1} = 10$ , perceptual loss weight in 1st stage  $\lambda_{perc} = 0.00005$ , perceptual loss weight in 2nd stage  $\lambda_{perc} = 0.0005$ . The adversarial losses on the images and style discriminator losses all have weight 1.

In the first training stage we sample  $z \sim \mathcal{N}(0, \mathcal{I})$  and  $r_R \sim \mathcal{U}(-r_{lim}, r_{lim})$ , where  $r_R$  is the rotation sample for real data and  $r_{lim}$  is a pre-determined, per axis rotation limit. In all our experiments we set  $r_{lim}$  to be identical to the rotation limits used in synthetic data generation as described in the dataset section. In the second stage the  $E_R$  output corresponding to  $r_R$  is constrained to the range specified in  $r_{lim}$  by using a tanh activation and multiplying the output by  $r_{lim}$ .

Table 4 shows the architecture of the generator network  $G$ . In each AdaIN [14] input the latent vector  $z$  is processed by a 2-layer MLP. The volume rotation layer is the same as the one used in HoloGAN [27]. Table 5 shows the architecture of the image discriminators  $D_R$ ,  $D_S$ . Following [27], most of the convolutional



Table 4: Architecture of the generator network  $G$ 

| Layer name          | Kernel shape          | Activation | Output shape                        | Normalisation |
|---------------------|-----------------------|------------|-------------------------------------|---------------|
| learned const input | -                     | -          | $4 \times 4 \times 4 \times 512$    | -             |
| upsampling          | -                     | -          | $8 \times 8 \times 8 \times 512$    | -             |
| conv3d_1            | $3 \times 3 \times 3$ | LReLU      | $8 \times 8 \times 8 \times 256$    | AdaIN         |
| upsampling          | -                     | -          | $16 \times 16 \times 16 \times 256$ | -             |
| conv3d_2            | $3 \times 3 \times 3$ | LReLU      | $16 \times 16 \times 16 \times 128$ | AdaIN         |
| volume rotation     | -                     | -          | $16 \times 16 \times 16 \times 128$ | -             |
| conv3d_3            | $3 \times 3 \times 3$ | LReLU      | $16 \times 16 \times 16 \times 64$  | -             |
| conv3d_4            | $3 \times 3 \times 3$ | LReLU      | $16 \times 16 \times 16 \times 64$  | -             |
| reshape             | -                     | -          | $16 \times 16 \times (16 \cdot 64)$ | -             |
| conv2d_1            | $1 \times 1$          | LReLU      | $16 \times 16 \times 512$           | -             |
| conv2d_2            | $4 \times 4$          | LReLU      | $16 \times 16 \times 256$           | AdaIN         |
| upsampling          | -                     | -          | $32 \times 32 \times 256$           | -             |
| conv2d_3            | $4 \times 4$          | LReLU      | $32 \times 32 \times 64$            | AdaIN         |
| upsampling          | -                     | -          | $64 \times 64 \times 64$            | -             |
| conv2d_4            | $4 \times 4$          | LReLU      | $64 \times 64 \times 32$            | AdaIN         |
| upsampling          | -                     | -          | $128 \times 128 \times 32$          | -             |
| conv2d_5            | $4 \times 4$          | LReLU      | $128 \times 128 \times 32$          | AdaIN         |
| upsampling          | -                     | -          | $256 \times 256 \times 32$          | -             |
| conv2d_6            | $4 \times 4$          | tanh       | $256 \times 256 \times 3$           | -             |

Table 5: Architecture of the image discriminator networks  $D_R, D_S$ 

| Layer name      | Kernel shape, stride | Activation | Output shape               | Normalisation |
|-----------------|----------------------|------------|----------------------------|---------------|
| conv2d_1        | $1 \times 1, 1$      | -          | $256 \times 256 \times 3$  | -             |
| conv2d_2        | $3 \times 3, 2$      | LReLU      | $128 \times 128 \times 48$ | Instance Norm |
| conv2d_3        | $3 \times 3, 2$      | LReLU      | $64 \times 64 \times 96$   | Instance Norm |
| conv2d_4        | $3 \times 3, 2$      | LReLU      | $32 \times 32 \times 192$  | Instance Norm |
| conv2d_5        | $3 \times 3, 2$      | LReLU      | $16 \times 16 \times 384$  | Instance Norm |
| conv2d_6        | $3 \times 3, 2$      | LReLU      | $8 \times 8 \times 768$    | Instance Norm |
| fully connected | 49152                | -          | 1                          | -             |

layers of the discriminator use instance normalization [40]. The latent GAN generator  $G_{lat}$  and discriminator share the same 3-layer MLP architecture.

The networks are optimized using Adam [19] with a learning rate of  $4e-4$ . We perform the first stage of training for 50k iterations and then the second stage for 100k iterations. The latent GAN is also trained for 100k iterations. Following [16], in both the latent GAN and decoder  $G$ , we keep an exponential running mean of the weights during training and use those smoothed weights to generate all results.

## 6.5 Factorized latent space details

Table 6 shows the dimensionalities of all latent space factors  $z_i$  and corresponding synthetic data parameters  $\theta_i$ . The dimensionalities of each  $z_i$  were chosen based

Table 6: Dimensionalities and descriptions of latent space factors

| Factor name         | $\dim \theta_i$ | $\dim z_i$ | Description of $\theta_i$             |
|---------------------|-----------------|------------|---------------------------------------|
| beard style         | 9               | 7          | PCA coefficients                      |
| eyebrow style       | 44              | 7          | PCA coefficients                      |
| expression          | 52              | 30         | 3D head model parameters $\in [0, 1]$ |
| eye colour          | 6               | 3          | one-hot encoding                      |
| eye rotation        | 3               | 2          | rotation angles                       |
| hair colour         | 3               | 3          | melanin, grayness, redness            |
| hair style          | 18              | 8          | PCA coefficients                      |
| head shape          | 53              | 30         | 3D head model parameters              |
| illumination        | 50              | 20         | PCA coefficients                      |
| lower eyelash style | 3               | 2          | one-hot encoding                      |
| texture             | 50              | 30         | VAE latent space vector               |
| upper eyelash style | 3               | 2          | one-hot encoding                      |

on perceived complexity of the feature, for example we allocate more dimensions to expression than to hair colour. We are able to exert control over all the parameters with the exception of eyelash styles, which correspond to features that are too small at the image resolution we are working in. The expression parameters consist of the 51 expression blendshapes described in [3] and one additional dimension for the rotation of the jaw bone that leads to mouth opening.

## 6.6 Controllability metric details

The attribute predictor  $C_{pred}$  we use for the metrics is a MobilenetV2 [33] trained to predict 38 of CelebA’s 40 attributes. The two attributes we do not predict are Wearing\_Necklace and Wearing\_Necktie as the required features are not present in our crops of CelebA images. For controllability metrics computed using the attribute predictor we use ConfigNet to drive 8 attributes, while we use all 38 attributes to compute the MD value. The 8 attributes we drive are chosen to be non-ambiguous and easy to verify by the user study participants.

For each evaluated face attribute  $v$  we set the corresponding  $z_i = E_{S_i}(\theta_i)$ , where  $\theta_i$  is determined by manual inspection for both  $I_-$  and  $I_+$ . For example, for  $v$  smile we set the expression parameters that correspond to mouth corners going up for  $I_+$ , while for  $I_-$  we set parameters that correspond to mouth corners going down. Note that in this experiment we do not use the fine-grained control method described in Section 3.6, we instead set the entire  $\theta_i$  with the chosen value.

## 6.7 Entanglement in synthetic dataset

While SynthFace allows for disentangling many face attributes, we have found that some of its properties lead to entanglement. In SynthFace each texture is applied together with a corresponding displacement map, this leads to entanglement between texture and face shape. Examples of such entanglement are

noticeable in texture row of Figure 14. The eyebrow style row of the same figure shows changes in eyebrow height, which are entangled with the eyebrow raise expression. This is due to the varying vertical placement of eyebrows in SynthFace.

Another issue is that in SynthFace a neutral face can have an open mouth. Because of that, applying a neutral expression does not always lead to the mouth closing, this issue is visible in top row of Figure 7. In those cases, the mouths can still be closed by setting the value of the mouth opening expression to negative. The same issue applies to other expressions to a smaller degree.

## 6.8 Additional figures

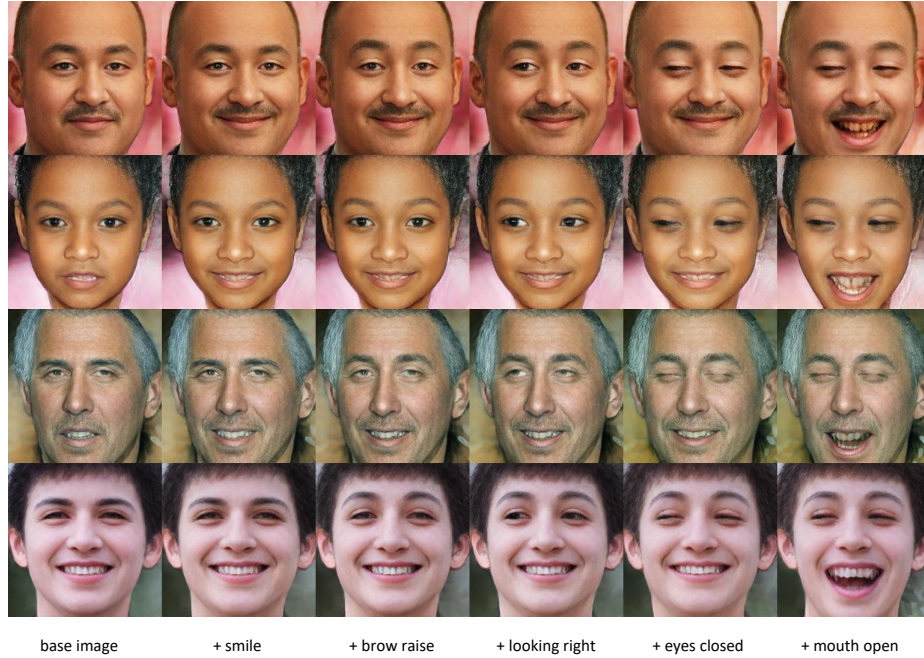

Fig. 12: Generation of combinations of facial expressions. The left column shows the base image while each subsequent column adds another expression to the image. With the exception of looking right each expression is added using the fine-grained control method described in Section 3.6.

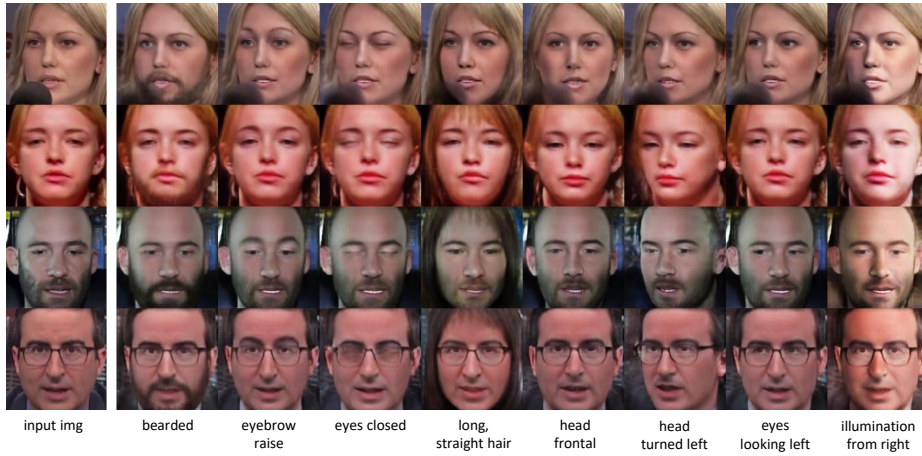

Fig. 13: Modification of various attributes of faces from the 300-VW dataset [32] using ConfigNet fine-tuned on the input image.

---

**Algorithm 1:** Fine grained control. The algorithm uses projected gradient descent to estimate the synthetic data rendering parameter  $\tilde{\theta}_i$  that maps to the supplied  $z_i$ .  $\tilde{\theta}_i$  can then be modified to obtain a new  $z_i = E_S(\tilde{\theta}_i)$ . Since  $\tilde{\theta}_i$  is a parameter of a computer graphics pipeline, it is semantically meaningful and its individual components can be modified to achieve fine-grained control.

---

**Input:** latent space factor  $z_i$ , number of iterations  $n$ , learning rate  $\gamma$

**Result:** modified latent space factor  $z_i$

iter = 0;

$\tilde{\theta}_i = [0, 0, \dots, 0]$ ;

**while** iter <  $n$  **do**

$L = |z_i - E_{S_i}(\tilde{\theta}_i)|^2$ ;

$\tilde{\theta}_i = \tilde{\theta}_i - \gamma \nabla L$ ;

    clip  $\tilde{\theta}_i$  to the range of valid values of  $\theta_i$ ;

    iter++;

**end**

apply desired modification to  $\tilde{\theta}_i$ ;

$z_i = E_{S_i}(\tilde{\theta}_i)$ ;

---



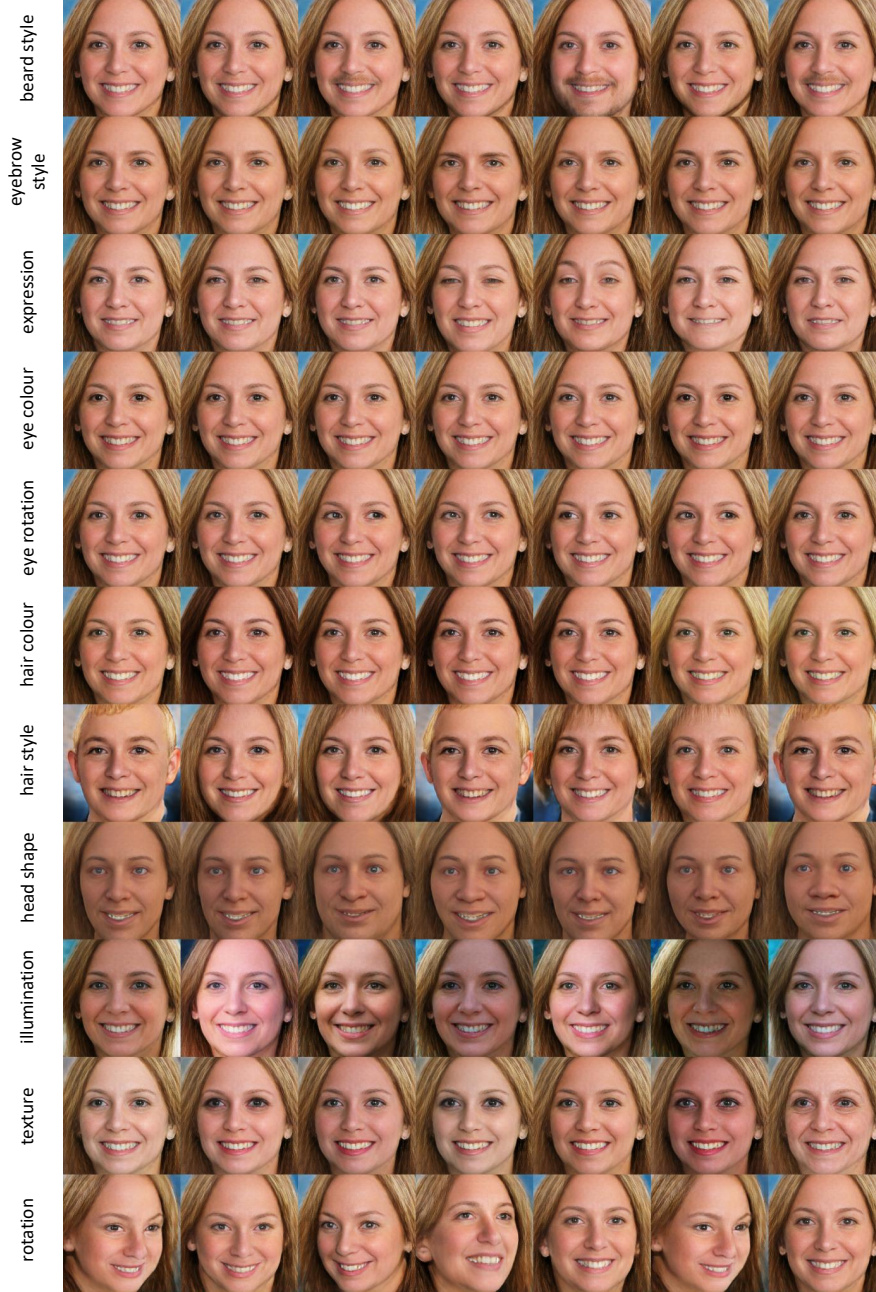

Fig. 14: Random variations of the input factors of ConfigNet shown on a single base image. In each row a single latent space factor  $z_i = E_S(\theta_i)$  is modified, with each row showing a different, randomly selected  $\theta_i$ . Note the change of appearance when modifying head shape, discussion in Section 4.4.

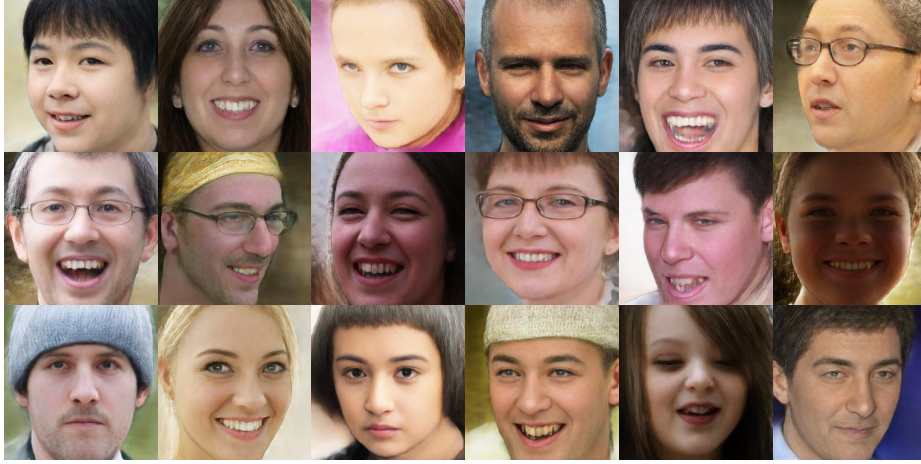

Fig. 15: Results of sampling the latent space  $z = E_R(I_R)$ , where  $I_R$  is randomly selected from FFHQ [17].

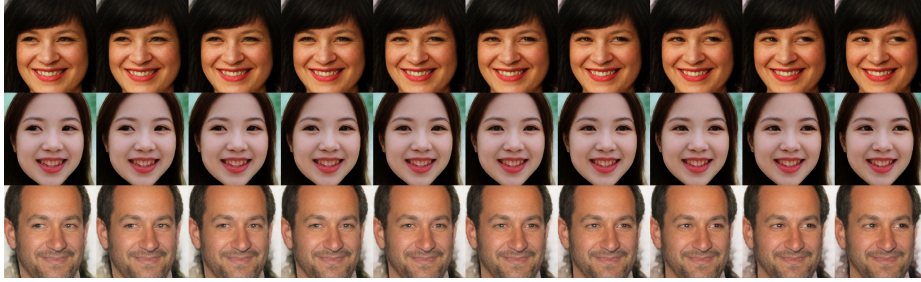

(a) Model trained with the eye gaze loss

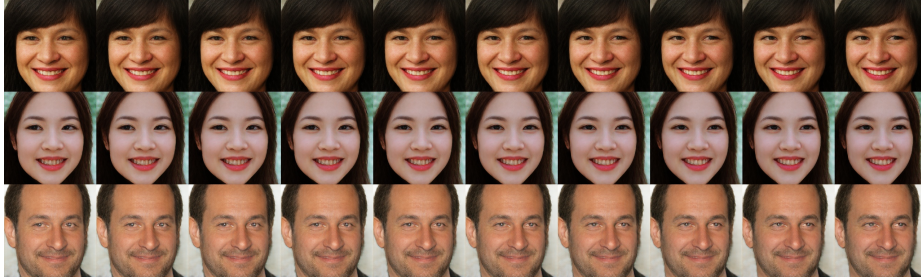

(b) Model trained without the eye gaze loss

Fig. 16: Comparison of control over eye gaze direction for a model trained with the eye gaze loss  $\mathcal{L}_{eye}$  and a model trained without it. Notice that a) achieves a wider range of eye motion, which is most visible in the first and last column of each row.



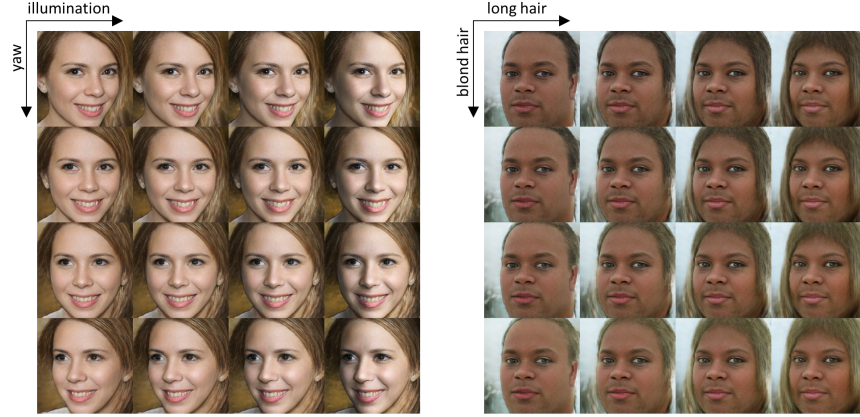

Fig. 17: Interpolation of two face attribute at a time in images sampled from the FFHQ [17] dataset. Note that the illumination direction stays constant as the head rotates.

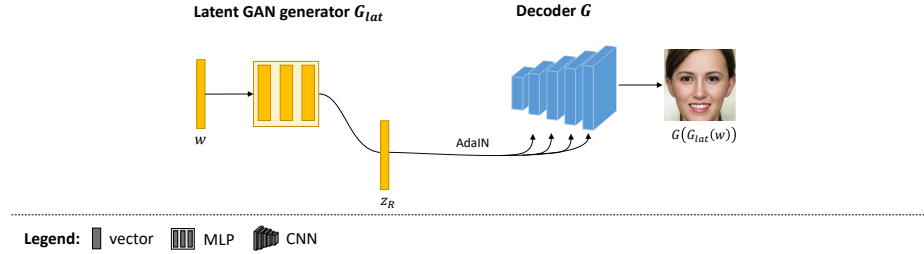

Fig. 18: Outline of the method at inference time, when the latent GAN (described in Section 3.5) is used to sample the latent space  $z_r = G_{lat}(w)$ , where  $w \sim \mathcal{N}(0, I)$ . Keep in mind that  $z_r$  can still be modified using any of the methods described in the paper to achieve control over the output image.
